# Supplementary material for: Construction and validation of a novel IGFBP3-related signature to predict prognosis and therapeutic decision making for Hepatocellular Carcinoma
Source: PeerJ. 2023 Jun 27;11:e15554. doi: 10.7717/peerj.15554 (PMC10312159; doi:10.7717/peerj.15554)
Supplement: Supplemental Information 6 [file peerj-11-15554-s006.xlsx]

## Sheet: Sheet1
列1	列2	列3	列4	列8	列9	列10
NO.	NAME	GENDER	AGE	admission number (AD)	date	pathological diagnosis
1		MALE	36		2022-10-02	HCC
2		MALE	65		2022-10-01	HCC
3		MALE	70		2022/9/31	HCC
4		FEMALE	65		2022-09-01	HCC
5		MALE	59		2022-09-01	HCC
6		FEMALE	69		2022-09-07	HCC
7		MALE	68		2022-09-27	HCC
8		MALE	69		2022-09-07	HCC
9		MALE	75		2022-09-26	HCC
10		MALE	68		2022-09-05	HCC
