# Supplementary material for: Construction and validation of a novel IGFBP3-related signature to predict prognosis and therapeutic decision making for Hepatocellular Carcinoma
Source: PeerJ. 2023 Jun 27;11:e15554. doi: 10.7717/peerj.15554 (PMC10312159; doi:10.7717/peerj.15554)
Supplement: Supplemental Information 7 [file peerj-11-15554-s007.xlsx]

## Sheet: Input Configuration
Tumor	Dataset	Analysis	Gene
Liver Cancer	Protein Abundance	Tumor vs Control	IGFBP3

## Sheet: Protein Abundance Data
Patient ID	Tumor Abundance	Adjacent Normal Abundance	Log2 Fold Change
001	-0.6738	0.0289	-0.7027
002	-0.863	-0.2076	-0.6554
003	-1.1986	0.539	-1.7376
004	1.3223	0.2305	1.0918
005	-1.1912	-0.3293	-0.8619
006	0.8185	0.0072	0.8113
007	-0.278	0.3574	-0.6354
008	-0.2058	0.0998	-0.3056
009	-0.3007	0.2249	-0.5256
010	-0.6878	0.3289	-1.0167
011	-0.858	-0.1369	-0.7211
012	-0.2899	-0.1211	-0.1688
013	-0.9217	-0.3143	-0.6074
014	0.2359	-0.0563	0.2922
015	-0.5481	-0.0212	-0.5269
016	-0.5628	2.3025	-2.8653
017	-0.2156	-0.0628	-0.1528
018	-0.5755	0.112	-0.6875
019	0.195	0.1935	0.0015
020	-0.0198	-0.0952	0.0754
021	0.2868	0.3591	-0.0723
022	-0.514	-0.0421	-0.4719
023	-1.1575	0.1114	-1.2689
024	0.2268	0.1103	0.1165
025	-0.5919	-0.0924	-0.4995
026	-1.2391	0.1714	-1.4105
027	-0.2377	0.0811	-0.3188
028	-0.7779	-0.3265	-0.4514
029	0.2464	-0.2898	0.5362
030	0.3906	-0.2271	0.6177
031	0.9981	-0.0528	1.0509
032	0.5237	0.4026	0.1211
033	0.1674	-0.6843	0.8517
034	-0.8603	-0.4597	-0.4006
035	0.0084	-0.8499	0.8583
036	-0.6977	0.037	-0.7347
037	2.1735	0.364	1.8095
038	-0.9024	0.0687	-0.9711
039	0.584	-0.3582	0.9422
040	-0.8862	-0.544	-0.3422
041	-0.5341	0.2589	-0.793
042	-0.0465	-0.3088	0.2623
043	-0.2365	0.282	-0.5185
044	0.6402	0.2882	0.352
045	1.8319	0.1351	1.6968
046	-0.1054	0.083	-0.1884
047	0.2063	0.4103	-0.204
048	-0.0878	0.2883	-0.3761
049	0.0407	0.1798	-0.1391
050	1.8791	0.1765	1.7026
051	-0.0326	0.1823	-0.2149
052	-1.3006	0.0585	-1.3591
053	-0.7755	-0.2957	-0.4798
054	0.0938	0.0174	0.0764
055	-0.5305	-0.2794	-0.2511
056	-1.2536	-0.4832	-0.7704
057	1.6606	-0.3758	2.0364
058	-0.9175	-0.1474	-0.7701
059	-1.0588	-0.5433	-0.5155
060	0.0134	0.2004	-0.187
061	-1.2172	-0.0389	-1.1783
062	-0.2165	-0.0738	-0.1427
063	-0.9171	-0.2738	-0.6433
064	-0.7169	0.2812	-0.9981
065	0.1515	0.1776	-0.0261
066	-0.141	-0.4358	0.2948
067	0.4315	-0.1519	0.5834
068	-1.1678	0.1005	-1.2683
069	-0.352	-0.043	-0.309
070	0.8957	-0.2888	1.1845
071	-0.905	0.3857	-1.2907
072	-0.7522	-0.05	-0.7022
073	-1.0896	-0.6861	-0.4035
074	-0.3733	-0.0483	-0.325
075	-0.5554	-0.5537	-0.0017
076	0.8356	0.461	0.3746
077	-0.444	-0.2659	-0.1781
078	-0.3749	0.2388	-0.6137
079	-0.7931	-0.313	-0.4801
080	-0.2945	0.7674	-1.0619
081	0.1336	-0.0685	0.2021
082	0.4631	0.2441	0.219
083	-0.1594	0.1216	-0.281
084	0.1088	-0.4324	0.5412
085	-1.4157	-0.0936	-1.3221
086	-0.0763	0.6353	-0.7116
087	1.1865	0.3152	0.8713
088	0.0201	0.5318	-0.5117
089	-0.7645	-0.0043	-0.7602
090	-0.3206	-0.3369	0.0163
091	-0.204	-0.1828	-0.0212
092	-0.6978	0.0261	-0.7239
093	2.7866	0.0796	2.707
094	-0.6122	-0.1335	-0.4787
095	-0.5975	0.1569	-0.7544
096	-0.6544	0.1906	-0.845
097	-0.5867	-0.0283	-0.5584
098	-0.78	0.304	-1.084
099	-0.4894	-0.2236	-0.2658
100	-0.4275	-0.1512	-0.2763
101	-0.7504	-0.3555	-0.3949
102	-0.8649	-0.3606	-0.5043
103	0.4663	-0.1088	0.5751
104	0.1154	-0.1687	0.2841
105	-0.586	-0.1944	-0.3916
106	-0.0034	-0.0306	0.0272
107	-0.1721	-0.1402	-0.0319
108	-0.544	-0.3727	-0.1713
110	-0.9085	-0.5258	-0.3827
111	-0.0791	-0.2582	0.1791
112	-1.1805	-0.3296	-0.8509
113	1.9776	0.5348	1.4428
114	0.7175	0.2769	0.4406
115	-0.8795	-0.6206	-0.2589
116	-0.9707	-0.0773	-0.8934
117	-0.1155	-0.2979	0.1824
118	-0.0077	-0.4377	0.43
119	0.4093	0.2967	0.1126
120	0.4553	-0.167	0.6223
121	0.8172	-0.24	1.0572
122	0.3841	-0.0387	0.4228
123	-0.0978	-0.1594	0.0616
124	-1.0578	0.4146	-1.4724
125	-0.7421	0.042	-0.7841
126	-0.0757	0.4176	-0.4933
127	-0.5839	-0.0947	-0.4892
128	-0.3572	1.1105	-1.4677
129	1.5062	0.4774	1.0288
130	0.0939	-0.1517	0.2456
131	-0.0865	0.4686	-0.5551
132	-1.3778	-0.4101	-0.9677
133	-0.6942	0.2743	-0.9685
134	-1.235	-0.1893	-1.0457
135	-0.0041	0.2566	-0.2607
136	0.3953	-0.0253	0.4206
137	-0.1892	0.0431	-0.2323
138	-1.4609	-0.3947	-1.0662
139	-1.2268	0.0865	-1.3133
140	-0.1577	0.1115	-0.2692
141	0.6547	0.4928	0.1619
142	0.5059	0.0006	0.5053
143	-0.0785	0.2575	-0.336
144	0.276	0.4055	-0.1295
145	-0.2076	-0.038	-0.1696
146	-0.8937	-0.0463	-0.8474
147	0.1988	-0.1356	0.3344
148	0.0099	0.184	-0.1741
149	-0.7523	-0.6987	-0.0536
150	-0.1158	-0.3267	0.2109
151	1.0881	-0.6463	1.7344
152	-1.0037	-0.6757	-0.328
153	-0.6419	-0.3587	-0.2832
154	-0.3259	-0.1217	-0.2042
155	0.2887	-0.194	0.4827
156	-0.3463	0.354	-0.7003
157	-0.901	-0.42	-0.481
158	-0.3426	-0.462	0.1194
159	-0.6421	0.6616	-1.3037
160	0.5084	0.3172	0.1912
