# Supplementary material for: Construction and validation of a novel IGFBP3-related signature to predict prognosis and therapeutic decision making for Hepatocellular Carcinoma
Source: PeerJ. 2023 Jun 27;11:e15554. doi: 10.7717/peerj.15554 (PMC10312159; doi:10.7717/peerj.15554)
Supplement: Table S1 [file peerj-11-15554-s003.xlsx]

## Sheet: 1
Dataset	Database	Data type	Sample information
TCGA-LIHC	TCGA	mRNA expression data&Clinical information	50 normals, 374 HCCs, and 365 HCCs with complete survival data
GTEx（liver）	GTEx	mRNA expression data	110 normals
ICGC-LIRI-JP	ICGC	mRNA expression data	202 normals and 240 HCCs
GSE54236	GEO	mRNA expression data	81 normals and 82 HCCs
GSE14520 (GPL3921)	GEO	mRNA expression data&Clinical information	220 normals, 225 HCCs, and 221 HCCs with complete survival data
GSE76427	GEO	mRNA expression data	52 normals and 115 HCCs
CAPTC-LIHC	CAPTC	Protein Abundance Data	159 HCCs and 159 matched normal tissue
