# Supplementary material for: Construction and validation of a novel IGFBP3-related signature to predict prognosis and therapeutic decision making for Hepatocellular Carcinoma
Source: PeerJ. 2023 Jun 27;11:e15554. doi: 10.7717/peerj.15554 (PMC10312159; doi:10.7717/peerj.15554)
Supplement: Table S2 [file peerj-11-15554-s004.xlsx]

## Sheet: TOP200 genes
GSE14520			TCGA-LIHC			GSE76427
symbol	correlation	pvalue	symbol	correlation	pvalue	symbol	correlation	pvalue
TMEM45A	0.425434	2.64033e-11	HGF	0.572689	3.12e-38	WSB1	0.495968	1.73813e-08
RGS2	0.418848	5.69873e-11	ECM1	0.531708	3.05e-32	ECM1	0.489799	2.76867e-08
HIF1A	0.404737	2.80316e-10	SERPINE1	0.509395	2.61e-29	VEGFB	0.489735	2.78189e-08
IFT57	0.392095	1.09806e-09	RGS2	0.50295	1.68e-28	STK33	0.486256	3.60253e-08
PKM2	0.389474	1.44701e-09	BMPER	0.49501	1.57e-27	PAM	0.483663	4.35964e-08
VCL	0.387942	1.69828e-09	RND3	0.492763	2.92e-27	HOOK1	0.478107	6.52688e-08
PRKAR2B	0.387005	1.87231e-09	DUSP6	0.491735	3.88e-27	DACH1	0.47719	6.97165e-08
GPC4	0.384233	2.49422e-09	JUNB	0.491475	4.17e-27	UGCG	0.475369	7.9423e-08
GOLPH2	0.383388	2.72088e-09	LIFR	0.491158	4.55e-27	IER5L	0.473401	9.13586e-08
SLC38A1	0.383063	2.81305e-09	PLAC8	0.485522	2.11e-26	PLEKHA4	0.47111	1.07406e-07
CD24	0.375112	6.29087e-09	C1QTNF1	0.485312	2.23e-26	UPP1	0.469168	1.23092e-07
FNDC3B	0.373736	7.21503e-09	CD300A	0.483851	3.3e-26	RASSF7	0.465937	1.54138e-07
IER3	0.373366	7.4853e-09	TMEM45A	0.483129	4e-26	TMEM156	0.46529	1.61194e-07
MYO10	0.364437	1.79222e-08	MARCO	0.481702	5.86e-26	TGFA	0.461357	2.11169e-07
PNMA1	0.364163	1.84003e-08	PDGFRA	0.47867	1.31e-25	PROM1	0.460506	2.23779e-07
GALNT7	0.362786	2.10007e-08	GDF2	0.477008	2.02e-25	PDGFRA	0.457825	2.6837e-07
SLC6A8	0.357582	3.44126e-08	F3	0.476375	2.39e-25	PHLDB1	0.449472	4.68063e-07
NEDD9	0.357089	3.60437e-08	DUSP5	0.47553	2.98e-25	MCL1	0.447666	5.26841e-07
PAM	0.356956	3.64969e-08	STAB2	0.47447	3.92e-25	MMP23A	0.446852	5.55576e-07
SLC4A7	0.35443	4.62131e-08	CXCL14	0.473897	4.55e-25	PHF21A	0.446653	5.62857e-07
PLXNA3	0.352882	5.33515e-08	SOCS3	0.470907	9.85e-25	LTBP4	0.444843	6.33019e-07
DZIP1	0.351232	6.21251e-08	QSOX1	0.470477	1.1e-24	RASSF9	0.443558	6.87856e-07
FAM57A	0.348451	8.01477e-08	PPP1R15A	0.468735	1.72e-24	ABCG1	0.443419	6.94044e-07
MTHFD2	0.347876	8.44519e-08	TCIM	0.466253	3.22e-24	ITGA5	0.441791	7.70624e-07
MXRA7	0.347397	8.82097e-08	CCBE1	0.464215	5.39e-24	RGS2	0.439761	8.77347e-07
DUSP6	0.347042	9.10997e-08	PRKAR2B	0.464009	5.68e-24	PPP1R15A	0.437177	1.03367e-06
ADAMTS5	0.346907	9.22176e-08	EGR2	0.46387	5.88e-24	HID1	0.43482	1.19899e-06
PFKFB3	0.346713	9.38514e-08	TMEM26	0.462373	8.55e-24	ITGA3	0.433021	1.34171e-06
CD63	0.346622	9.46297e-08	PTGS2	0.461766	9.94e-24	IER3	0.432377	1.3966e-06
S100A13	0.346487	9.58e-08	DACH1	0.461445	1.08e-23	SPIRE1	0.431732	1.4538e-06
ENO2	0.346412	9.64456e-08	ADAMTS13	0.460764	1.28e-23	DBNDD2	0.431045	1.51706e-06
SLC2A6	0.345722	1.02656e-07	FOS	0.457256	3.03e-23	MAP3K6	0.430494	1.56967e-06
ABL1	0.345169	1.07901e-07	FPR1	0.456597	3.57e-23	ZSWIM6	0.43016	1.60241e-06
TMEM165	0.342949	1.31689e-07	NPY1R	0.455731	4.41e-23	CHSY1	0.429105	1.71016e-06
MARCKSL1	0.342631	1.35492e-07	SIGLEC7	0.455155	5.07e-23	SGPP2	0.42856	1.7685e-06
TESC	0.340735	1.6039e-07	PFKFB3	0.453959	6.79e-23	LOC100133077	0.427739	1.85987e-06
FZD1	0.338956	1.87712e-07	SERPINB9	0.452136	1.06e-22	PFKFB3	0.425542	2.12712e-06
LAMB1	0.338834	1.89753e-07	IER3	0.450642	1.51e-22	STOM	0.424642	2.24669e-06
NEBL	0.33814	2.01705e-07	LILRA2	0.450468	1.58e-22	NCK2	0.424271	2.29777e-06
QSCN6	0.338058	2.03159e-07	SMIM25	0.450106	1.72e-22	SIRPA	0.423523	2.40428e-06
JUNB	0.337844	2.07008e-07	AMIGO2	0.44977	1.86e-22	DSEL	0.42229	2.59005e-06
ZNF532	0.336605	2.30754e-07	SLC7A8	0.449729	1.88e-22	MAFF	0.422238	2.59822e-06
CLSTN1	0.33654	2.32068e-07	CLEC4G	0.448505	2.52e-22	ZNF532	0.422217	2.60158e-06
PELI1	0.334948	2.66616e-07	ZFP36	0.447991	2.85e-22	QSOX1	0.4219	2.65161e-06
C12orf22	0.334423	2.79044e-07	FENDRR	0.446239	4.32e-22	WDR72	0.421598	2.70019e-06
DSG2	0.333353	3.06141e-07	IL1RAP	0.445858	4.73e-22	RSPO3	0.421336	2.74313e-06
SERPINE1	0.332081	3.41609e-07	CLEC1B	0.444682	6.24e-22	PFN1	0.420219	2.93317e-06
CXCL14	0.331641	3.54778e-07	RSPO3	0.443616	8.02e-22	DUSP6	0.417984	3.70425e-06
JAG1	0.331136	3.70504e-07	PTGIS	0.443109	9.04e-22	CD63	0.417467	3.45565e-06
EP400	0.330561	3.89213e-07	NTF3	0.442141	1.13e-21	SLC12A2	0.416753	3.60513e-06
C14orf105	0.329979	4.09066e-07	LRRN3	0.440523	1.65e-21	VEZT	0.41569	3.83884e-06
GUCY1A3	0.32968	4.19634e-07	STAB1	0.440048	1.84e-21	ARHGEF2	0.414534	4.10922e-06
ANXA5	0.329465	4.27383e-07	CSRNP1	0.43997	1.88e-21	RCOR2	0.4139	4.26496e-06
LIMA1	0.329157	4.38748e-07	GPM6A	0.439384	2.15e-21	BACE2	0.411323	4.95778e-06
SOX4	0.329053	4.42662e-07	ITGA9	0.438857	2.43e-21	TANC2	0.411246	4.98019e-06
DKFZP564C152	0.328883	4.49129e-07	CLEC4M	0.438553	2.61e-21	RABL6	0.411214	4.98931e-06
TMSB10	0.328067	4.81335e-07	BASP1	0.438044	2.93e-21	OXTR	0.411177	4.99994e-06
TNIK	0.327372	5.10517e-07	SLC9A9	0.437875	3.05e-21	HES4	0.411054	5.03595e-06
DKFZP686A01247	0.3271	5.22404e-07	OLFML3	0.437039	3.69e-21	ITPR3	0.40993	5.37517e-06
TMEM51	0.326469	5.5099e-07	EPO	0.436762	3.94e-21	ADAM17	0.409256	5.58911e-06
CKAP4	0.326012	5.72657e-07	PAMR1	0.436701	3.99e-21	C1QTNF1	0.408072	5.98396e-06
FLNA	0.325611	5.92259e-07	EGR3	0.436665	4.03e-21	ADCY3	0.406553	6.52931e-06
SRPX	0.32524	6.11027e-07	HHIP	0.435586	5.15e-21	LDOC1	0.404237	7.45195e-06
RGS1	0.32521	6.12561e-07	PLAUR	0.435386	5.4e-21	TSPAN12	0.404201	7.46736e-06
SLC1A5	0.322951	7.3992e-07	IL13RA2	0.435111	5.74e-21	ADAMTSL2	0.403611	2.15221e-05
ARSJ	0.322858	7.45666e-07	SPRY2	0.433196	8.88e-21	B9D2	0.403295	7.86121e-06
RND3	0.322145	7.91236e-07	AXL	0.432977	9.33e-21	PLD1	0.402995	7.99599e-06
ALDOA	0.321456	8.37782e-07	NXF3	0.432856	9.59e-21	PNKP	0.40219	8.36854e-06
RAB31	0.320402	9.14012e-07	SIGLEC9	0.43262	1.01e-20	CDR2L	0.401867	8.52223e-06
PFKP	0.319844	9.57055e-07	CCN1	0.43251	1.04e-20	KLF5	0.401737	8.58534e-06
RNF24	0.319768	9.63081e-07	CHIC2	0.429539	2.03e-20	JUNB	0.400722	9.09016e-06
RBPSUH	0.318989	1.02673e-06	ZEB2	0.428564	2.52e-20	FZD1	0.400568	9.16926e-06
ICAM1	0.317334	1.17568e-06	BMP10	0.427751	3.02e-20	CPEB1	0.396849	1.12859e-05
S100A11	0.315751	1.33737e-06	SFRP1	0.427358	3.3e-20	EIF4A1	0.396522	1.14927e-05
TDG	0.315413	1.37447e-06	C14orf180	0.426151	4.31e-20	SLC16A3	0.396058	1.17921e-05
CRP	0.314631	1.46431e-06	MS4A6A	0.425243	5.27e-20	DMBT1	0.395977	1.18448e-05
VPS37B	0.312863	1.6884e-06	SFRP5	0.424504	6.2e-20	PLOD2	0.3957	1.20278e-05
CTBP2	0.312793	1.69795e-06	PTGER4	0.424496	6.21e-20	SYTL2	0.395308	1.22916e-05
NPY1R	0.31163	1.86362e-06	SRPX	0.424148	6.7e-20	MCUB	0.39325	1.3766e-05
TUBA3	0.310818	1.98849e-06	RGS1	0.422924	8.77e-20	NRGN	0.392586	1.42767e-05
S100A6	0.309956	2.12968e-06	LILRA5	0.422719	9.17e-20	TEX9	0.392438	1.43923e-05
CHSY1	0.309681	2.17665e-06	SDC3	0.422544	9.53e-20	TLCD3A	0.391913	1.48116e-05
SEMA3C	0.309289	2.24543e-06	COLEC10	0.422486	9.65e-20	SERTAD1	0.391826	1.48824e-05
PNMA2	0.309226	2.25658e-06	TNIK	0.422435	9.76e-20	VASP	0.39162	1.50502e-05
ARNT2	0.307054	2.6786e-06	CA9	0.42157	1.18e-19	MMP23B	0.39057	1.59368e-05
PHF21A	0.306777	2.73745e-06	FPR2	0.420926	1.36e-19	OSBPL10	0.39045	1.60407e-05
EGLN3	0.306713	2.75117e-06	FCHO1	0.419753	1.75e-19	NTF3	0.389894	1.65334e-05
CXCR4	0.306645	2.76587e-06	THBS1	0.419574	1.82e-19	CSRNP1	0.389827	1.65934e-05
TNC	0.306256	2.85174e-06	TMIGD3	0.41943	1.88e-19	P3H2	0.388137	1.81829e-05
WSB1	0.305751	2.9666e-06	ZFPM2	0.419427	1.88e-19	UBE2Q2	0.385145	2.13519e-05
ABCG1	0.305537	3.01664e-06	PRAM1	0.418633	2.23e-19	CLCF1	0.38504	2.14729e-05
TIMP1	0.305397	3.04981e-06	PVALB	0.4185	2.3e-19	RNF150	0.384301	2.23363e-05
SPRY1	0.305254	3.08417e-06	HCAR2	0.417643	2.76e-19	SCTR	0.384114	2.25597e-05
BNIP3L	0.305045	3.13501e-06	TMEM71	0.417612	2.78e-19	DLG4	0.383859	2.28684e-05
WNT4	0.304506	3.2695e-06	EHD3	0.416435	3.58e-19	TDG	0.38367	2.30994e-05
AYTL2	0.304236	3.33881e-06	PTH1R	0.415918	4e-19	HACD1	0.38329	2.35714e-05
PPP1R9A	0.304154	3.36027e-06	ENO2	0.415776	4.12e-19	AAGAB	0.383172	2.37196e-05
SGCB	0.303804	3.45283e-06	MMRN1	0.415619	4.26e-19	SLC25A24	0.382931	2.40239e-05
TNFRSF21	0.303339	3.57978e-06	ANK3	0.414752	5.13e-19	MNT	0.382073	2.51416e-05
LRRC8B	0.303293	3.59246e-06	LRAT	0.41472	5.17e-19	CLSTN2	0.382058	2.51619e-05
PTPRE	0.302761	3.74365e-06	GNB4	0.414092	5.9e-19	MGLL	0.381659	2.5698e-05
AMIGO2	0.302309	3.87664e-06	CFP	0.41407	5.93e-19	PROM2	0.381454	2.59784e-05
SDC3	0.301339	4.17785e-06	ARID5B	0.413619	6.53e-19	PAMR1	0.380511	2.73021e-05
DUSP5	0.300748	4.3719e-06	CXCR4	0.413356	6.91e-19	NXPH4	0.379503	2.87883e-05
FSCN1	0.300387	4.49487e-06	ADAP2	0.412985	7.47e-19	AEBP1	0.379411	3.69743e-05
MMD	0.299622	4.76597e-06	LRRC8B	0.412984	7.47e-19	NIBAN1	0.379247	2.91774e-05
LARP6	0.299091	4.96337e-06	SLC8A1	0.412969	7.5e-19	VTCN1	0.378374	3.05425e-05
EDG4	0.298368	5.24425e-06	PELI2	0.412712	7.92e-19	CCDC74A	0.37832	3.06284e-05
MLXIP	0.298074	5.36316e-06	HK3	0.412472	8.33e-19	TPBG	0.377924	3.12688e-05
NCALD	0.297729	5.50563e-06	RBMS3	0.412328	8.59e-19	NDST3	0.377873	3.1352e-05
HK2	0.297671	5.52979e-06	KIF19	0.412166	8.89e-19	DDR1	0.377572	3.18488e-05
NTS	0.297165	5.74594e-06	BMP5	0.412017	9.17e-19	CHSY3	0.377034	3.27538e-05
GPD1L	0.296271	6.14789e-06	PLEKHA2	0.412014	9.17e-19	MTA2	0.377018	3.27804e-05
TSPAN3	0.295411	6.56012e-06	HAND2-AS1	0.411839	9.52e-19	METRNL	0.376901	3.29805e-05
NAP1L1	0.295129	6.70063e-06	C1orf162	0.41161	9.99e-19	MUC1	0.376719	3.32946e-05
TAX1BP3	0.29466	6.94076e-06	AC010776.2	0.411002	1.14e-18	PTH1R	0.376338	3.39603e-05
ACTN1	0.294378	7.08939e-06	FAM102B	0.41082	1.18e-18	EHD2	0.376068	3.44403e-05
TMEFF1	0.294175	7.19807e-06	CYTIP	0.410483	1.27e-18	C2CD4B	0.375975	3.46067e-05
CDKN1C	0.294144	7.21458e-06	SLC7A7	0.409853	1.45e-18	PGM2L1	0.37551	3.54516e-05
ACTG1	0.293839	7.3813e-06	SAMSN1	0.409254	1.64e-18	ANK3	0.375447	3.55659e-05
PELI2	0.293705	7.45598e-06	FOXF1	0.408811	1.8e-18	GRM8	0.375364	3.57197e-05
MBOAT2	0.292379	8.2311e-06	ARL4C	0.408483	1.93e-18	DBN1	0.374526	3.73015e-05
PLAC8	0.291959	8.49223e-06	CHST4	0.407768	2.24e-18	TEAD4	0.374522	3.73091e-05
ADM	0.291529	8.76752e-06	EGR1	0.407719	2.26e-18	OSBPL5	0.373908	3.85104e-05
PLOD2	0.291321	8.9038e-06	FGR	0.407378	2.42e-18	LINC01191	0.373528	3.927e-05
MARCKS	0.291146	9.01997e-06	LHX2	0.406949	2.65e-18	SLAIN1	0.372332	4.17575e-05
GALNT12	0.290673	9.34151e-06	IL1B	0.406719	2.78e-18	TRAK2	0.371734	4.30564e-05
PARP8	0.290089	9.75331e-06	RNF122	0.406384	2.98e-18	IL20RA	0.371415	4.37654e-05
PRNP	0.289926	9.87162e-06	KLF4	0.406016	3.22e-18	NPW	0.369573	9.66557e-05
MICAL1	0.289256	1.0371e-05	PELI1	0.405264	3.76e-18	HSPA12A	0.369427	4.8429e-05
FBXL2	0.288695	1.08072e-05	PTGS1	0.404849	4.09e-18	TIMP1	0.36931	5.26362e-05
C8orf4	0.288688	1.08125e-05	COL6A6	0.404797	4.14e-18	MFSD6	0.369221	4.89371e-05
ATP10D	0.288316	1.11115e-05	CSF3R	0.404023	4.85e-18	CFTR	0.369076	4.93004e-05
COL9A2	0.287525	1.17734e-05	CHRM2	0.4034	5.52e-18	FURIN	0.369017	4.94484e-05
RNF20	0.287025	1.22119e-05	ST8SIA6	0.403094	5.87e-18	SLFN13	0.368855	4.98538e-05
TWSG1	0.286221	1.29479e-05	TCF21	0.402763	6.29e-18	LAMB1	0.368817	4.99504e-05
C11orf49	0.286207	1.29613e-05	SLC2A3	0.402363	6.82e-18	PLXDC2	0.368641	5.03995e-05
CTSS	0.286166	1.29998e-05	PRNP	0.402089	7.22e-18	CTBP2P4	0.367007	5.47352e-05
PLXNA1	0.285459	1.36845e-05	IGHV3-15	0.401947	7.43e-18	CDS1	0.36685	5.51685e-05
CCDC109B	0.284785	1.43685e-05	GEM	0.401811	7.64e-18	TEAD2	0.36682	5.52524e-05
DAB2	0.284705	1.44517e-05	PLK3	0.401758	7.72e-18	LIMCH1	0.36625	5.6858e-05
TPBG	0.284667	1.44921e-05	PLA2R1	0.401642	7.91e-18	ENO2	0.365635	5.86422e-05
AMPD3	0.284473	1.46962e-05	RAB3IL1	0.401359	8.38e-18	SFRP1	0.365342	5.95084e-05
PTX3	0.284367	1.48091e-05	BGN	0.401305	8.47e-18	NIPA1	0.365244	5.98024e-05
CTSC	0.284216	1.49711e-05	FMOD	0.401197	8.66e-18	MFSD10	0.365203	5.99245e-05
UBE2E1	0.284061	1.51393e-05	MBOAT4	0.400639	9.7e-18	GPX8	0.364839	6.10275e-05
KIAA0367	0.283874	1.53448e-05	DSE	0.400535	9.9e-18	WNT4	0.364303	6.26834e-05
SERPINE2	0.28378	1.54492e-05	DCN	0.400218	1.06e-17	PELI2	0.364271	6.27816e-05
ITGA3	0.283772	1.54588e-05	PLTP	0.400057	1.09e-17	YBX3	0.363681	6.46579e-05
UBE2Z	0.28315	1.61662e-05	SEMA6D	0.399496	1.22e-17	SEPTIN5	0.363515	6.51939e-05
PMP22	0.283084	1.62431e-05	FZD1	0.398905	1.38e-17	GLIS3	0.36331	6.58614e-05
TUBB6	0.282121	1.74047e-05	CXCR1	0.398627	1.46e-17	MYRFL	0.362999	6.68884e-05
MMP7	0.282065	1.74743e-05	RASSF9	0.398254	1.57e-17	PRSS23	0.362926	6.71324e-05
TRAF5	0.281861	1.77313e-05	GPR183	0.396768	2.12e-17	PDE1A	0.36281	6.75198e-05
CENTD1	0.281684	1.79561e-05	IL33	0.396641	2.17e-17	CFAP221	0.362205	6.95803e-05
PRKCBP1	0.281448	1.82619e-05	FCGR2B	0.396459	2.26e-17	PTGS2	0.36194	7.04993e-05
NUP62	0.281433	1.82821e-05	EPHA2	0.395939	2.5e-17	NPAS1	0.361878	7.07165e-05
MPPED2	0.28143	1.8285e-05	STX11	0.395553	2.7e-17	ZBTB4	0.361843	7.08389e-05
SLC9A1	0.281133	1.86769e-05	SLC5A1	0.395357	2.81e-17	KDM6B	0.361789	7.10277e-05
PRSS23	0.281061	1.87733e-05	DOCK8	0.395338	2.82e-17	HIF1A	0.361789	7.10289e-05
MNT	0.280804	1.91204e-05	EGLN3	0.395162	2.92e-17	HNF1B	0.361479	7.21253e-05
SERPINH1	0.280787	1.91433e-05	WDR66	0.395139	2.94e-17	HAL	0.361471	7.76986e-05
RPL6	0.280781	1.9152e-05	NDST3	0.395114	2.95e-17	TACSTD2	0.361263	0.000257514
ZNF140	0.280733	1.92164e-05	IGLV3-21	0.394483	3.35e-17	ZDHHC1	0.361154	7.32925e-05
SEMA3E	0.280613	1.93819e-05	SRGN	0.394411	3.4e-17	S100A13	0.360933	7.41002e-05
ZNF432	0.280521	1.95088e-05	TMEM263	0.394134	3.59e-17	ULK1	0.36059	7.53641e-05
DBN1	0.280201	1.99575e-05	CD300E	0.394018	3.67e-17	EYA4	0.360571	7.54329e-05
MMP10	0.280005	2.02384e-05	P3H2	0.393917	3.75e-17	PMAIP1	0.36019	7.6863e-05
ELF4	0.279784	2.05577e-05	CDH19	0.393829	3.81e-17	PDE5A	0.359625	7.90312e-05
KLF4	0.279397	2.11289e-05	PZP	0.393808	3.83e-17	DUSP5	0.359429	7.97972e-05
DDR1	0.279342	2.12123e-05	PDE4B	0.393618	3.98e-17	TMEM30A	0.358846	8.21104e-05
FKBP9	0.279271	2.1319e-05	NXPE3	0.39342	4.14e-17	INHBE	0.358589	0.000103469
CXorf6	0.278583	2.23807e-05	WDR72	0.393375	4.17e-17	ADGRL2	0.358403	8.39148e-05
VNN2	0.278369	2.27216e-05	CXCL12	0.393013	4.48e-17	SLC30A7	0.358382	8.4001e-05
G6PC3	0.278298	2.28356e-05	GUCY1A1	0.392963	4.53e-17	TRK-TTT3-5	0.358173	8.48615e-05
DDIT4	0.278118	2.31282e-05	P2RY12	0.392894	4.59e-17	NEO1	0.3576	8.72736e-05
SERPINB9	0.277982	2.33498e-05	NMUR1	0.392289	5.17e-17	UBE2M	0.357048	8.96545e-05
CDH11	0.277234	2.46127e-05	HPSE	0.392215	5.25e-17	EHBP1L1	0.355724	9.56165e-05
PDGFRA	0.277055	2.49229e-05	C21orf91	0.392157	5.31e-17	ADAMTS3	0.355655	9.59375e-05
BHLHB3	0.276975	2.50643e-05	LCP2	0.391858	5.63e-17	NAV2	0.355309	9.75637e-05
GUCY1B3	0.276064	2.67149e-05	AC010547.2	0.391393	6.17e-17	ANKDD1A	0.354801	9.9992e-05
CHFR	0.275804	2.72059e-05	PPP1R18	0.391142	6.49e-17	VNN1	0.354542	0.000116743
BACE2	0.275021	2.87311e-05	KCNK6	0.3911	6.54e-17	COL14A1	0.354509	0.000101412
KIAA0692	0.274555	2.96791e-05	TGFA	0.390791	6.95e-17	FBH1	0.353682	0.000105542
GABBR1	0.274516	2.97595e-05	PLEKHH2	0.390663	7.13e-17	HMCN1	0.353465	0.000106655
NDRG1	0.274313	3.01827e-05	BHLHE40	0.389811	8.43e-17	GABRP	0.35287	0.000109749
SLC24A3	0.274213	3.03923e-05	CRHBP	0.38945	9.04e-17	F3	0.352607	0.000111147
CHST12	0.274212	3.03938e-05	PHLDA1	0.389439	9.06e-17	SPACA6	0.352536	0.000111526
IL4R	0.274196	3.04285e-05	TENT5A	0.389309	9.3e-17	TUBB6	0.352377	0.000112381
FUT8	0.274182	3.04586e-05	TEX26	0.388761	1.03e-16	PKIB	0.351989	0.000114488
WDFY3	0.273986	3.0875e-05	CD4	0.388512	1.09e-16	SFRP5	0.351923	0.000114851
HEG1	0.273316	3.23428e-05	PLCXD3	0.388453	1.1e-16	CXCL16	0.351688	0.000116155
KIAA0746	0.273107	3.28136e-05	SAMD11	0.388168	1.16e-16	MSRB3	0.351639	0.000116426
SSBP2	0.273052	3.29381e-05	CEACAM3	0.387394	1.35e-16	GAREM2	0.351449	0.00011749
WARS	0.272932	3.32115e-05	PLIN2	0.387377	1.35e-16	CFD	0.351064	0.000128318
C7orf44	0.272852	3.33958e-05	FCN3	0.387338	1.37e-16	VCL	0.350965	0.000120238
PKD2	0.272373	3.4518e-05	NFAM1	0.387088	1.43e-16	DDX43	0.350564	0.000122563
TGFB1	0.271495	3.66686e-05	TIMD4	0.387017	1.45e-16	PMEPA1	0.349981	0.000126016
PLSCR1	0.271471	3.67268e-05	SPRED1	0.386669	1.55e-16	FOXC1	0.34883	0.000133099
GNAZ	0.271434	3.68215e-05	OSMR	0.386219	1.7e-16	PDCD4	0.348781	0.000133412
